# Disentangling sound from syntax: electrophysiological analysis of linguistics expressions

Fiorenzo Artoni<sup>1,2</sup>, Piergiorgio d'Orio<sup>3,4</sup>, Eleonora Catricalà<sup>5</sup>, Francesca Conca<sup>5</sup>, Franco Bottoni<sup>6</sup>, Veronica Pelliccia<sup>3,4</sup>, Ivana Sartori<sup>3</sup>, Giorgio Lo Russo<sup>3</sup>, Stefano F. Cappa<sup>5,7\*</sup>, Silvestro Micera<sup>1,2\*</sup>, Andrea Moro<sup>5</sup>

## Affiliations

<sup>1</sup>The Biorobotics Institute, Scuola Superiore Sant'Anna, Pisa, Italy.

<sup>2</sup>Translational Neural Engineering Laboratory, Center for Neuroprosthetics and Institute of Bioengineering, EPFL – Campus Biotech, Geneve, Switzerland.

<sup>3</sup>"Claudio Munari" Center for Epilepsy Surgery, ASST Grande Ospedale Metropolitano Niguarda, Milan, Italy

<sup>4</sup>Institute of Neuroscience, CNR, Parma, Italy

<sup>5</sup>Neurocognition Epistemology and theoretical Syntax Research Center (NEtS), Scuola Universitaria Superiore IUSS, Pavia, Italy.

<sup>6</sup>Istituto Clinico Humanitas, IRCCS, Rozzano, Italy.

<sup>7</sup>IRCCS S. Giovanni di Dio Fatebenefratelli, Brescia, Italy

Co-corresponding authors

SM (Silvestro.micera@epfl.ch[santannapisa.it]), AM (andrea.moro@iusspavia.it)

## Abstract

Syntax is a species-specific component of human language combining a finite set of words in a potentially infinite number of sentences. Since words are by definition expressed by sound, factoring out syntactic information is normally impossible. Here, we circumvented this problem in a novel way by designing phrases with exactly the same acoustic content but different syntactic structures depending on the other words they occur with. By performing stereo-electroencephalographic (SEEG) recordings in epileptic patients we measured a different electrophysiological correlate of verb phrases vs. noun phrases by analyzing the high gamma band activity (150-300Hz frequency), in multiple cortical areas in both hemispheres, including language areas and their homologous in the non-dominant hemisphere. Our findings contribute to the ultimate goal of a complete neural decoding of linguistic structures from the brain.

## Keywords

Language, syntax, neural decoding, meaning, Stereo EEG

## Introduction

Human language is a complex system evolved to store, elaborate and communicate information among individuals. Traditionally, it is analyzed as constituted by three major domains: the physical support which is necessary for communication (the acoustic level), the archive of words isolating concepts and logical operators (the lexicon) and a set of rules combining words into larger units (syntax). Meaning is computed by interpreting syntactic structures but it is not strictly necessary to generate well-formed linguistics expressions, given the possibility to construe meaningless structures such as *this triangle is a circle*<sup>1,2</sup>. The role of syntax in this complex system is crucial for at least three distinct empirical and theoretical reasons: first, syntax can generate new meaning by permuting the same set of words (so for example, *Abel killed Cain* is different from *Cain killed Abel*); second, there is no upper limit to the number of words that can enter the syntactic composition: syntax can potentially generate an infinite set of structures; third, it appears to be the real species-specific boundary distinguishing human language from that of all other animals<sup>3</sup>. Unfortunately, given this integrated and complex design characterizing language, isolating electrophysiological information solely related to syntax seems to be impossible by definition, since sound is inevitably intertwined with syntactic information<sup>4,5</sup> even during inner speech<sup>6</sup>: in fact, sound representation is already associated to the words in the lexicon before entering the syntactic computation. The current research has provided three major advancements in the comprehension of syntax: a preliminary distinction between single words in isolation, basically nouns and verbs<sup>7</sup>; the demonstration that the severely restricted formal properties of syntax “are not arbitrary and culturally conventions” – to put it in Lenneberg’s seminal perspective but rather the expression of the morphological and functional architecture of the brain<sup>8-10</sup>; third, the combination<sup>8-10</sup> of an increasing number of words in sequences correlates with an increasing electrophysiological activity<sup>11</sup>. However, the specific

electrophysiological correlates of the syntactic operation as related to specific and different types of words remain completely unknown. We still lack the distinction of basic syntactic structures, such as what correlates with merging of an article with a noun yielding a Noun Phrase (NP) or an object with a verb yielding a Verb Phrase (VP).

Here, we addressed this issue by designing a novel protocol to circumvent this problem and measure the specific electrophysiological correlates of two basic and core syntactic structures factoring out sound representation. The stimuli were pairs of different sentences containing strings of two words with exactly the same acoustic information but completely different syntax (homophonous strings). More specifically, each pair contained an NP, resulting from syntactic combination of two lexical elements (a definite article and a noun), and a VP, resulting from the syntactic combination of two different types of lexical elements (a verb and a pronominal complement): the NP and the VP were pronounced in exactly the same way. In addition, each VP included a further crucial difference: the object of the verb, realized as a pronoun, was moved from its canonical position on the right of the verb to the left of the verb, a syntactic operation called “cliticization”. This novel strategy was made possible by relying on Italian language. For example, the sequence [laʔpɔrta], could be interpreted either as a noun phrase (“the door”) or a verb phrase (“brings her”; lit.: her brings) depending on the syntactic context within the sentence where they were pronounced (Figure 1). As for the acoustic information concerning the homophonous phrases, it must be noticed that for each pair of sentences containing the same homophonous phrase, either phrase was deleted and substituted with a copy of the other one: this strategy was exploited to avoid the possibility that the structure of the two phrases could be distinguished by subtle intonational or prosodic clues: practically, the relevant part of the stimuli constituting the homophonous phrase was physically exactly the same. Although these results were based on a peculiar property of Italian language, our results are generalizable to other languages because the basic distinction of nouns vs. verbs is universally attested across-languages<sup>12</sup>. As for other variables constituting the homophonous phrases, words were balanced for major semantic features (such as abstract vs. concrete) and length (number of syllables).

## Results

The two sentence types were first differentiated by the level of “surprisal”, an information-theoretic concept reflecting the expectedness of each word given its preceding context, which is defined as the negative log probability of a certain word in a sentence, given the words that precede it in that sentence<sup>13</sup>. The analysis shows that whereas there is no significant surprisal difference for the Verb/Noun position in the phrase, the values related to the article/clitic position were significantly different (Figure 2). In fact, the more complex syntactic structure, i.e. the VP involving movement of the object from the right to the left position of the verb, resulted

in a higher surprisal level when the same auditory input was interpreted as a clitic rather than an article, as indicated by classical statistics and by decoding in the feature space with a Support Vector Machine (SVM) analysis. Table S1 reports the number of valid cases, the percentage of missing, the mean and the standard deviation relative to the surprisal value, separately for the two experimental conditions. As reported in Table S2, 84% (n = 26) of the sentences with low surprisal were NPs and 84% (n = 26) of the sentences with high surprisal were VPs.

To fully exploit the potentials offered by homophonous strings we investigated the electrophysiological correlates of these NPs vs. VPs with intracranial electrodes for stereo-electro-encephalography (SEEG) monitoring (see Figure S1 with the visualization information for one subject for the assessment of anatomical electrical sources). Invasive intracranial EEG monitoring allows us to precisely localize sources of activation. This procedure offers a unique opportunity to observe human brain activity with an unparalleled combination of spatial and temporal resolution, impossible otherwise by using the available non-invasive recording and imaging techniques.

A total of 23 patients undergoing surgical implantation of electrodes for the treatment of refractory epilepsy<sup>14</sup> completed all experimental sessions. Only patients without anatomical alterations, as evident on MR, were included. No seizure occurred, no alterations in the sleep/wake cycle were observed, and no additional pharmacological treatments were applied during the 24 h before the experimental recording. Neurological examination was unremarkable in all cases; in particular, no neuropsychological and language deficits were found in any patient. In all patients, language dominance was assessed with high frequency stimulation (50 Hz, 3 mA, 5 sec) during SEEG monitoring. Two patients also underwent a fMRI study during a language task before the electrodes implantation.

Eight patients were excluded after analysis as they exhibited pathological EEG findings. Five patients were also excluded because no explored recording contact showed a task-related significant activation. Demographic data are shown in Table S3. In the remaining 10 subjects, a total of 164 electrodes were implanted (median 16.5 range 13-19), corresponding to 2186 recording contacts (median 210; range 168-272). The number of contacts in the grey matter was 1439 (65.8%); 586 recording contacts in the language dominant hemisphere (DH). The DH was explored in 5 subjects (median electrodes 16, range 3-18; median contacts 210, range 25-225). The non-dominant hemisphere (NDH) was explored in 6 subjects (median electrodes 15, range 14-19; median contacts 208, range 182-272). SEEG exploration involved both hemispheres with a preference for the non-dominant side in 1 patient.

The temporal lobe was the most explored brain region, with 26 electrodes in DH and 42 electrodes in NDH, followed by frontal lobe (22 electrodes in DH and 21 in NDH).

The central lobe was implanted with a total of 22 electrodes (9 in DH). The Parieto-Occipital region was studied with a total of 9 electrodes in DH and 21 in NDH.

The contacts that exhibited a significantly different response according to whether the homophonous words belonged to VPs or NPs are considered “responsive contacts” (RCs). An example of RC is shown in Figure 3.

To validate the setup processing pipeline we analyzed the ERPImage and event related spectral perturbation (ERSP) of contacts responsive to the auditory stimuli (i.e., Heschl) and highlighted clear auditory event-related potentials (ERPs) and power increase time locked to the stimuli presentations (Figure S2). Also, we retained in the RCs pools only the contacts where the different response between VPs and NPs was specific to the time region of interest (tROI, time interval that spans from the beginning of Art/Cl to the end of Noun/Verb). Incidentally, the high gamma frequency interval (150 – 300 Hz) showed the greatest tROI specificity in RCs. As an example, a RC (B13) is compared to a Heschl contact in Figure S3. Only B13 shows (i) significantly higher power in the VP high gamma [150 - 300] time ROI (S) with respect to NP (Panel C, 4<sup>th</sup> row, bottom right) and (ii) a significant power difference between VP and NP high gamma in the time ROI ( $\Delta S$ ) with respect to other time periods in the phrase, e.g., from the beginning of the phrase to Art/Cl,  $\Delta A_1$  (Panel C, 4<sup>th</sup> row, bottom left).

The ERSP analysis indicated that 242 (16.2%) of the leads exploring grey matter exhibited a significant high gamma (150Hz – 300Hz) power increase during the presentation of the corresponding VP homophonous phrase with respect to both the baseline and the other words (113 DH, 129 NDH).

The percentage of RCs in the DH was higher compared to that in the NDH (19.3% vs. 15.1%) and the difference was significant ( $p=0.044$ , Fisher’s exact test).

The majority of RCs was found in the temporal lobe (133; 54.9%; 62DH; 71NDH), the majority of which in the middle temporal gyrus (55; 22.7%; 29 DH; 26 NDH) and in the superior temporal gyrus (9; 3.7%; 7 DH; 2 NDH). Out of 44 RCs (18.2%; 10 DH; 34 NDH) found in the frontal lobe, the majority of which were in the inferior frontal gyrus (13; 29.5%; 3 DH; 10 NDH) and in the frontal part of cingulate gyrus (20; 45.5%; 2 DH; 18 NDH). A detailed description of the localization of RCs for each patient can be found in Table S4. Figure 4 shows all RCs positioned and template-matched after warping each patient’s MRI scan<sup>15</sup>.

## Discussion

In this manuscript, we defined and exploited a novel protocol to better understand the neural correlates of syntactic structure. In the sEEG signals we always found higher ERSP for VPs with respect to NPs. This was true in particular for the verb/noun segment (see Figure 3, second panel, after the dotted line) but it was also true - even if with less evidence - for the article/clitic segment preceding the verb/noun one (see Figure 3, second panel, before the dotted line): this strongly supports the conclusion that the observed difference cannot be

reduced to the morphological properties of nouns vs. verbs but that it rather pertains to the syntactic operations yielding a VP and a NP.

High gamma activity (>100Hz) is receiving a growing interest to understand and characterize inter-regional cortical communications<sup>16</sup>. This band is one of the most used indices of cortical activity associated to cognitive function, and has been shown to be correlated with the neuronal spiking rate and to the hemodynamic BOLD response measured with functional magnetic resonance in both animal models<sup>17</sup> and in human cortex<sup>18,19</sup>. In particular, a large body of studies have indicated its value in tracking cortical activity during language perception and production<sup>20</sup>, supporting its use as a safer alternative to cortical stimulation for the presurgical mapping of cortical language areas<sup>21</sup>. In the present study, a significant increase of high gamma event related spectral perturbation<sup>22</sup> (ERSP) was a specific index of the exposure to the syntactic contrast between clitic-verb phrases as compared to homophonous article-noun phrases.

This specific impact of syntactic structure on high gamma activity was not limited to the areas traditionally associated with syntactic processing on the basis of lesion effects and functional magnetic resonance evidence<sup>23</sup>. It must be underlined that a robust literature indicates that a categorial morphological contrast between Nouns and Verbs is indeed reflected in terms of lateralization and localisation<sup>7</sup>.

The different activity observed in our experiment must then be related to a different factor, namely the syntactic structure of the stimuli. In particular, given that the physical stimuli were the same and that we did not observe the typical correlates distinguishing distinct lexical categories, such as noun and verbs, the higher activity of VPs can reasonably be correlated with the surviving difference, namely syntactic structure involving the operation of displacement of the object clitic from the right to the left side of the verb. Furthermore, these results suggest that, while syntactic impairment is known to be caused by focal lesions affecting nodal structures in a dedicated network, syntactic processing must involve a much more integrated pattern of brain activity than expected. Finally, our results concerning syntactic structures converge with parsing as shown by the surprisal analysis. Syntactic surprisal is related to the expectedness of a given word's syntactic category given its preceding context<sup>24</sup> and is associated with widespread bilateral activity indexed by the BOLD signal<sup>25</sup>. In fact, the position of the object to the left of the verb is reflected in the higher surprisal, showing that this measure is sensitive to syntactic structure.

All in all, the results found in confronting homophonous VPs and NPs allow us to factor out sound from the electrophysiological stimulus and consequently highlight a specific syntactic information distinguishing these universal linguistic structures. Notice that this separation could by no means be obtained by analyzing the electrophysiological correlates of inner speech since it has been proved that acoustic information is represented in higher language areas even when words are simply thought<sup>6</sup>. This first step provided here opens up to a

deeper understanding of the structure and nature of human language and contributes to the ultimate far reaching goal of a complete neural decoding of linguistic structures from the brain<sup>26</sup>.

## Materials and Methods

### Stimuli

A novel set of stimuli which capitalizes on three special characteristics of Italian has been provided. First, some definite articles (such as [la] written as la; “the fem.sing.”) are pronounced exactly like some object clitic pronouns (such as [la] written as la; “her fem.sing.”): both items are monosyllabic morphemes inflected by gender and number. Second, the syntax of articles and clitic pronouns is very different: like in English, articles precede nouns whereas complements follow verbs but, crucially, object clitics are obligatorily displaced the left of the verb with finite tenses. Third, the Italian lexicon contains several homophonous pairs of verb and nouns, such as [ˈpɔrta] (written porta), which can either mean “door” or “brings”. Combining these facts together, a set of pairs of words such as [la ˈpɔrta] (written as la porta) has been construed which could be interpreted either as noun phrases (“the door”) or verb phrases (“brings it”) depending on the syntactic context (homophonous phrases) they are inserted in. Moreover, in order to be sure that no phonological or prosodical factors distinguish the two types of phrases, the exact copy of the pronunciation of one phrase replaced the other in either sentence in the acoustic stimuli. No other semantic or lexical distinction differentiated the two types of phrases which were balanced for major semantic features (such as abstract vs. concrete).

The acoustic stimuli were recorded using a Sennheiser Microphone MH40P48, Sound Card: Motu Ultralight Mk3, Connection: Firewire 400, Computer: Apple OSX 10.5.8. The stimuli were edited using Audiodesk 3.02 and mastered using Peak Pro7. Files were generated in 16bit, 44.1 kHz (Sampling Frequency); intensity was normalized to 0 Db and rendered in .wav format. All sentences were read by the same person: Italian native speaker, male, 53 years old.

### Surprisal value computation

The value of surprisal ( $S$ ) indicates how unexpected a given word is on the bases of the preceding word<sup>27</sup>. In order to calculate the surprisal value associated to each word of the sentence, we used the algorithms developed by Roark<sup>28</sup> with a model of Probabilistic Context Free Grammar (PCFG):  $S = -\log \left[ \frac{P(w_i)}{P(w_{1,2,\dots,i-1})} \right]$ , where  $P(w_i)$  corresponds to the probability of occurrence of the target word and  $P(w_{1,2,\dots,i-1})$  to the probability of occurrence of the preceding words. More in details, given the word  $w_i$ , the value of surprisal has been obtained through the logarithm of the ratio between the probability of occurrence of the bigram containing the target

word (i.e.,  $Bigram_{w_i}$ ) and the probability of occurrence of the word immediately preceding the target word

(i.e.,  $Unigram_{w_{i-1}}$ ). The formula is as follows:  $S_{w_i} = -\log \left[ \frac{P(Bigram_{w_i})}{P(Unigram_{w_{i-1}})} \right]$ . For instance, in the sentence

pulisce la porta con l'acqua ("s/he cleans the door with water") the value of surprisal associated with the Italian

word la (the definite article preceding the noun) is:  $S(la) = -\log \left[ \frac{P(pulisce+la)}{P(pulisce)} \right]$

In order to obtain the frequency of unigrams (i.e., single words) and bigrams (i.e., pairs of words), we initially considered the online databases "La Repubblica", a corpus derived from Italian newspaper texts written between 1985 and 2000 and containing about 380 million words and of the Italian WEB Corpus (ITWAC<sup>29</sup>, obtained from Italian texts on the Internet, composed by about 1.5 billion words. For each unigram and bigram, we reported both the occurrence of the form, i.e. word's frequency considering the specific category (e.g. article vs pronoun), and of the lemma, i.e. word's frequency without taking into account the differentiation into categories. We then calculated the value of surprisal (both derived from the occurrence of the form and the lemma, for both databases) associated with all the elements of the sentences belonging to the two experimental conditions (i.e., clitic + verb and article + noun).

Of note, sentences n.4 and n.63 were excluded from the analyses since they were not organized with the same structure as the other stimuli, i.e. article + noun or clitic + verb. Sentences n.51 and n.52 were excluded because both belonged to clitic + verb condition, namely containing the same target word. The data discussed were therefore related to 31 verb-phrases and 31 noun-phrases.

Statistical analyses were performed both on the form and on the lemma for both databases. Due to the presence of missing values (see the table for the percentages of misses, divided by condition) we considered only the analyses based on ITWAC lemma values.

We compared the value of surprisal associated to the two target elements of the two types of experimental phrases by means of paired samples t-test. Specifically, we compared the value of surprisal associated with the article with that associated with the pronoun and the value of surprisal associated with the noun with that associated with the verb. Since sentences n.4 and n.63 were excluded (see previous paragraphs), the corresponding sentences, respectively, noun-phrase n.3 and verb-phrase n.64 were considered as the two paired elements in the analysis.

The analyses showed significant differences between the value of surprisal of the article compared to that of the pronoun ( $t = -6.794$ ,  $p < .001$ ), with a higher surprisal value found for pronouns than for articles. No significant differences were found between the value of surprisal associated to nouns and that associated to verbs ( $t = 1.357$ ,  $p = .185$ ).



In order to dichotomize the surprisal variable, we divided the distribution of the surprisal values of articles and clitics on the basis of the median ( $M = 1.9097$ ) obtained from the occurrence of the lemma in the ITWAC database. The values were divided, respectively, into high and low surprisal.

## Patients

A total of 23 patients were recruited for the present study among those who underwent on surgical implantation of multi leads intracerebral electrodes for refractory epilepsy in the “Claudio Munari” Epilepsy Surgery Center of Milan in Italy<sup>30,31</sup>. Only patients with negative MRI and with no neurological and/or neuropsychological deficits were included. Based on anatomo–electro–clinical correlations, each patient-specific strategy of implantation was defined purely on clinical needs, in order to define the 3D shape of the epileptogenic zone (EZ).

Demographic data of the 10 patients included in the analysis are reported in Table S3.

The present study received the approval of the Ethics Committee of ASST Grande Ospedale Metropolitano Niguarda (ID 939-2.12.2013) and informed consent was obtained.

## Surgical Procedure and Recording Equipment

All trajectories of patient-related implantation strategy are planned on 3D multimodal imaging and the electrodes are stereotactically implanted with robotic assistance. The whole workflow was detailed elsewhere<sup>32</sup>. SEEG electrodes are probes with a diameter of 0.8 mm, comprising 5 to 18 2 mm long leads, 1.5 mm apart. A post-implantation Cone-Beam-CT, obtained with the O-arm scanner (Medtronic, Minneapolis, Minnesota), is subsequently registered to pre-implantation 3D T1W MR, in order to assess accurately the position of every recording lead. Finally, a multimodal scene is assembled with 3D Slicer<sup>33</sup>, aimed at providing the epileptologist with interactive images for the best assessment of anatomical electrical sources (Figure S1).

During the experiment the SEEG was continuously sampled at 1000Hz (patients 1-12) and 2000Hz (patients 12-23) by means of a 192 channels SEEG device (EEG-1200 Neurofax, Nihon Kohden). In each patient, all leads from all electrodes were referenced to two contiguous leads in the white matter, in which electrical stimulations did not produce any subjective or objective manifestation (neutral reference).

## Recording Protocol

Each subject rested in a comfortable armchair. Constant feedback was sought from the patient to ensure the overall comfort of the setup for the whole duration experiment. Stimuli were delivered in the auditory modality (see also Figure 1) using Presentation from Neurobehavioral Systems software. Phrases were delivered via audio amplifiers at a comfortable volume for the subject (minimum volume for words to be perceived with ease, according to the subject) while gazing at a little cross on a screen (27 inches). A synchronization TTL trigger

spike was sent to the SEEG trigger port at the beginning of auditory presentation (sentence). Jitter and delays were tested and verified to be negligible (less than 1ms). The whole experiment lasted around 30 minutes to maximize engagement. At the end of each task, subjects were asked to answer a few short questions on the content of the stimuli. Indeed, patients were always able to provide correct answers to the questions, thus demonstrating their continuous engagement to the task.

A camera, synchronized to the SEEG recording at source, was used to control for excessive blinking, maintenance of fixation with no eye movement, silence and any unexpected behavior from the patients.

### **Control Experiment**

As a further control for the analysis, the first three subjects underwent an extra auditory task. The modalities remained the same, however the sounds were substituted with beeps (auditory presentation) not carrying any meaning at all.

### **Data analysis**

A band-pass filter (0.015–500 Hz) applied at hardware level prevented any aliasing effect from altering SEEG data. Recordings were visually inspected by clinicians and scientists in order to ensure the absence of artifacts or any pathological interictal activity. Pathological channels were discarded. Further analyses were carried out using custom routines based on Matlab, Python and the EEGLab toolbox<sup>34</sup>. Data were annotated with the events triggered by the beginning of each stimulus. Events were time locked to the beginning of each word (initial syllable of the word for auditory presentation).

Epochs were extracted in the intervals [-1.5 4.5] s, time-locked to the initial presentation (i.e., beginning of the phrase). The length of the epoch was selected so as to always include the complete stimulus presentation (trial). Epochs with prominent artifacts (e.g. spikes) over significant channels were rejected. To determine significant responsive sites, analyses were performed both in the time and frequency domains. Epochs were then sorted into two classes based on the surprisal value (low or high).

#### **Analyses in the time domain**

In the time domain, single-trial data epochs were color-coded by amplitude to form a ERPIImage 2D view<sup>34</sup>, without any smoothing over trials (Figure S2, panel C). The ERPIImage allowed to assess the presence of Event-Related Potentials (ERPs) and their significance over time (e.g., to verify the presence of any habituation phenomena) with respect to the baseline. The ERPIImage analysis was performed both (i) after time-warping the trials so as to temporally align the other events and (ii) after aligning the trials to the beginning of the

beginning of Art/Cl position in the phrase and annotating the relative position of the other events (i.e., beginning of the sentence, beginning of the first and second words after Art/Cl).

### **Analyses in the frequency domain**

Time-frequency transforms of each trial were normalized to the baseline (divisive baseline, ranging from -1500ms to -5ms time-locked to the beginning of the sentence), time-warped to the beginning of the sentence, beginning of Art/Cl, beginning of the first and second word after, then they were averaged across trials to obtain the event-related spectral perturbations (ERSPs) a generalization of ERD/ERS analyses to a wider range of frequencies<sup>35</sup> (Ext. Data Figure 2, Panel B), i.e., from theta (1-4Hz) to high gamma (150-300 Hz). A bootstrap distribution over the trials baseline was used to determine significance ( $p < 0.05$ ) of the time-frequency voxels. We considered the average ERSP across the Gamma ([50 – 150] Hz) and High Gamma ([150 – 300 Hz]) frequency bands to obtain band-specific ERSP (bERSP) and compared it over time between low and high surprisal (Ext. Data Figure 2, Panel A). These bands were selected after a preliminary analysis of data related to Heschl gyrus in real and control experiments, which highlighted the presence of significant bERSP up to 300 Hz (see Ext. Data Figure 2 panel B). The preliminary analysis also showed that several contacts reported a significant time-specific differentiation in high gamma ([150 – 300] Hz) bERSP between VPs and NPs and we used that frequency band to highlight responsive contacts (see next paragraph).

### **Identification of responsive contacts**

Each contact (i.e., channel) for each subject underwent a series of screenings to determine its significance. A contact was deemed responsive if either low or high surprisal high gamma bERSP had significant amplitude specifically in the tROI (interval that spans from the beginning of Art/Cl to the end of Noun/Verb), for a significant time span. The amplitude was deemed significant if and only if greater than 95% of the distribution of amplitudes across frequencies for a significant time span. A time span was deemed significant if longer than the 95% of significant intervals in the baseline. The rationale of this test was to exclude those contacts that did not reach significance in the time ROI and ensure specificity in frequency (i.e., statistically different low and high surprisal high gamma time courses - only one of them being over threshold, or both being over threshold but statistically different –  $p < 0.05$ ), and time, (i.e., no significance when performing the same analysis at other time intervals such as from the second word after Art/Cl to the end of the sentence or from the beginning of the sentence to the beginning of the Art/Cl). Significant contacts were then ranked from high to low *sig* values according to the formula  $sig = a * t / \sum a_i t_i$  where  $a$  is the maximum amplitude over the time ROI,  $t$  is the length of the interval within the time ROI the amplitude is significant,  $a_i$  and  $t_i$  respectively the maximum amplitude and length of the interval at the other positions (i) in the phrase (i.e., outside the tROI). The rationale

of this formula was to determine the contacts that highlighted the maximum time-specific significant difference.

An inspection of all the contacts was also visually performed by expert clinicians and results were compared to the data-driven analysis in a double-blind fashion. The concordance was 84%. This analysis provided both validation to the data-driven analysis and also provided an extra control that selected responsive contacts (i) were not located in the white matter, (ii) were not located in affected regions of the brain, (iii) exhibited similar behaviour (e.g., high gamma time course waveform shape) if anatomically close and referring to the same brain region.

### **Decoding**

Decoding of the phrase type (noun and verb phrases) was first performed based on the surprisal relative to the Art/Cl and Verb/Noun parts of the phrases (Figure 2). After testing for normality (Kolmogorov-Smirnov), VP and NP surprisal values were also statistically compared (ANOVA, 1-Way). Decoding of the two classes was also performed on the feature space formed, for each trial, by the Art/Cl surprisal value and the power amplitude in the time ROI (Figure 3). In both cases a Support Vector Machine (SVM) algorithm with leave-one-out cross validation (LOOCV) was implemented to ensure the generalizability of the model.

### **Acknowledgements**

We thank Elia Zanin for his help during the preparation of the stimuli. This work was partly funded by the Bertarelli Foundation, by the Ministero Istruzione Università e Ricerca (MIUR) DM 610/2017 and by the European Union's Horizon 2020 research and innovation programme under Marie Skłodowska Curie grant agreement No. 750947 (project BIREHAB).

### **Author Contributions**

AM conceived the theoretical linguistic paradigm. FA, SC, SM, AM designed the experiment. AM construed the auditory stimuli. FA developed and integrated the experiment setup for stimuli presentation and synchronized recordings and developed the data processing algorithms. FA, PdO, VP, IS and GLR performed the recordings of the electrophysiological data. FA, IS, PdO analysed the data, critically reviewed the results at each analysis step and wrote the results. EC and FC elaborated the lexical and frequency statistics. FB recorded and edited the stimuli. SM supervised the processing activities. FA, SC, SM, AM wrote the paper. All the other authors provided comments to the manuscript and approved it.

## Declaration of interests

The authors do not have anything to disclose.

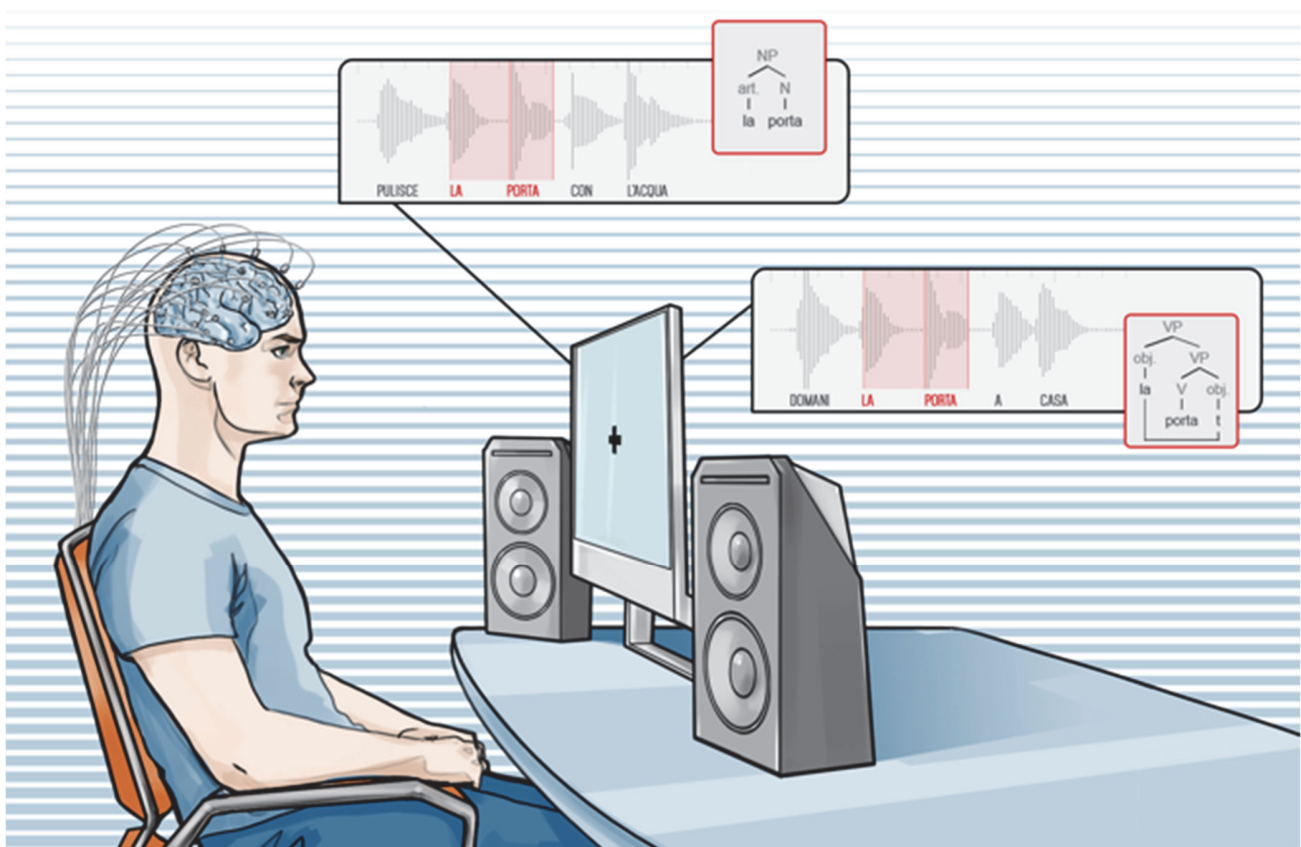

**Figure 1** Example of auditory stimuli presented to the subject. Languages may contain homophonous sequences, i.e. strings of words with the same sound and different syntactic structure. For example, in Italian, the very same sequence of phonemes [la' pɔrta] may have two completely different meanings and two different syntactic structures:

- (i) LA (the) PORTA (door) as in PULISCE LA PORTA CON L'ACQUA (s/he cleans the door with water)
- (ii) LA (her) PORTA (brings) as in DOMANI LA PORTA A CASA (tomorrow s/he brings her home)

In the first sequence [la' pɔrta] (written here as: *la porta*) is a Noun Phrase: the article *la* (the) precedes the noun *porta* (door). In the second sequence, instead, the very same sequence is a Verb Phrase: the object clitic pronoun *la* (her) precedes the verb *porta* (brings) which governs it. The difference is not only reflected in the distinct lexical classes, there is also a major syntactic difference: in the case of the noun phrase the element preceding the noun, namely the article, is base generated in that position; in the case of the verb phrase, instead, the element preceding the verb in the acoustic stimulus, namely the clitic pronoun, is base generated on the right of the verb occupying the canonical position of complements and then

displaced to a preverbal position. This fundamental syntactic difference is represented in the syntactic trees in the picture: “t” indicates the position where the pronoun is base generated in the VP. Notably, to exclude phonological or prosodical factors which may distinguish the two types of phrases, in our experiment the exact copy of the pronunciation of one phrase replaced the other in either sentence in the acoustic stimuli. In other words, subjects heard the very same acoustic stimulus for each homophonous phrase.

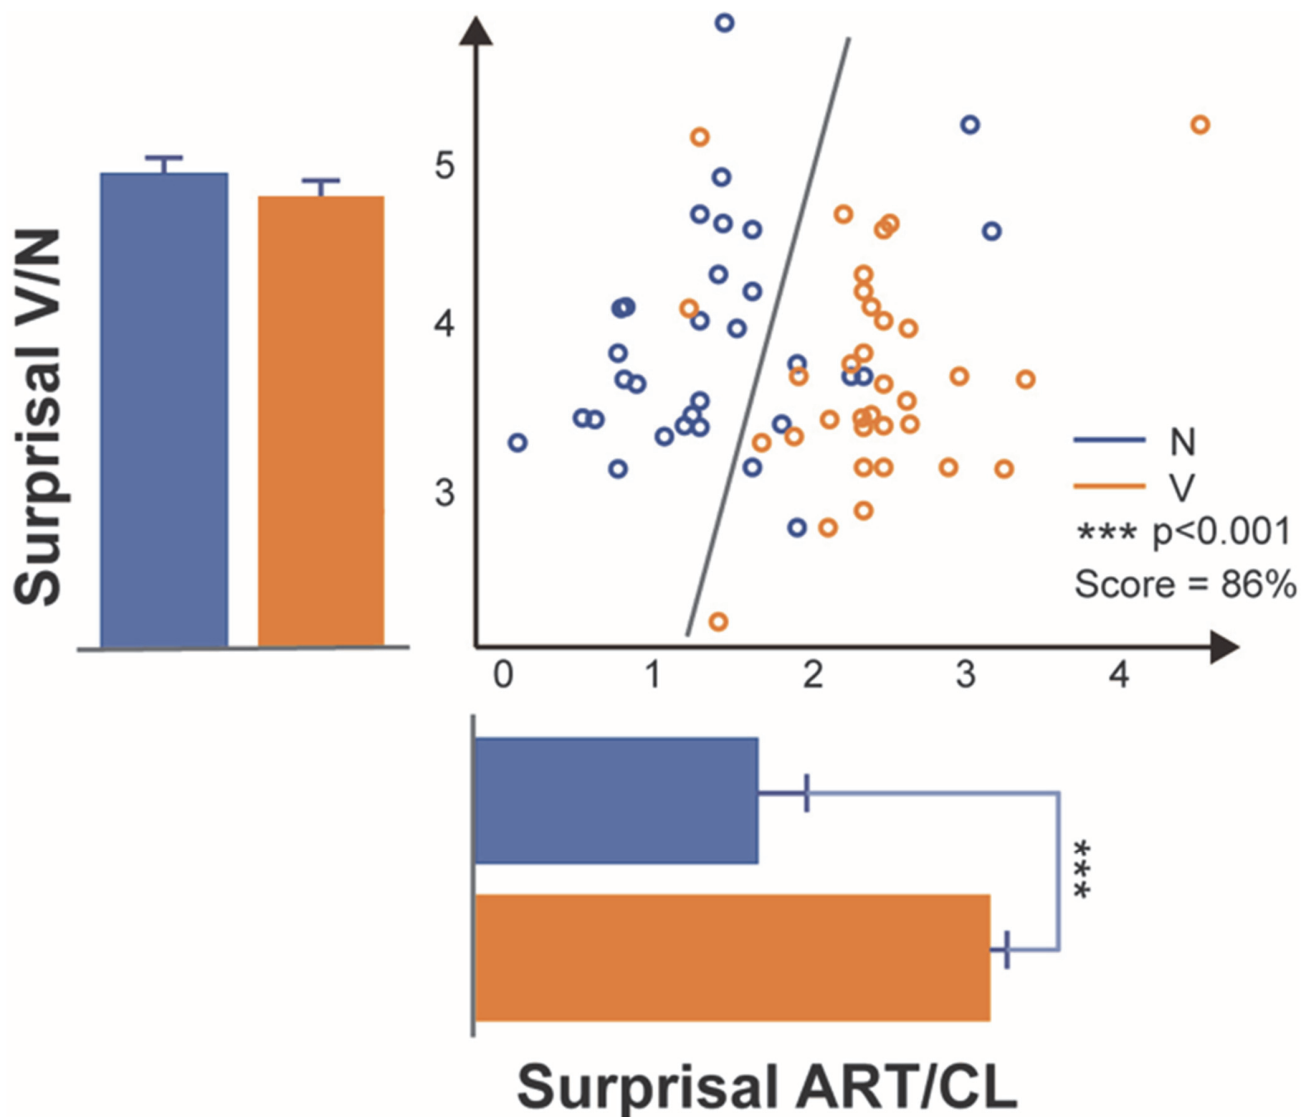

**Figure 2 Surprisal analysis.** Scatter plot of ITWAC surprisal values related to the Art/Cl (x axis) and Verb/Noun (y axis) position in the phrase. The gray line optimally separates (Support Vector Machine analysis) the Verb and Noun surprisal values with a Score of 86%. The bars represent the average and standard deviations of the surprisal values distribution for VPs (orange) and NPs (blue), tested for significance (ANOVA, 1 way). \*\*\* =  $p < 0.001$ .



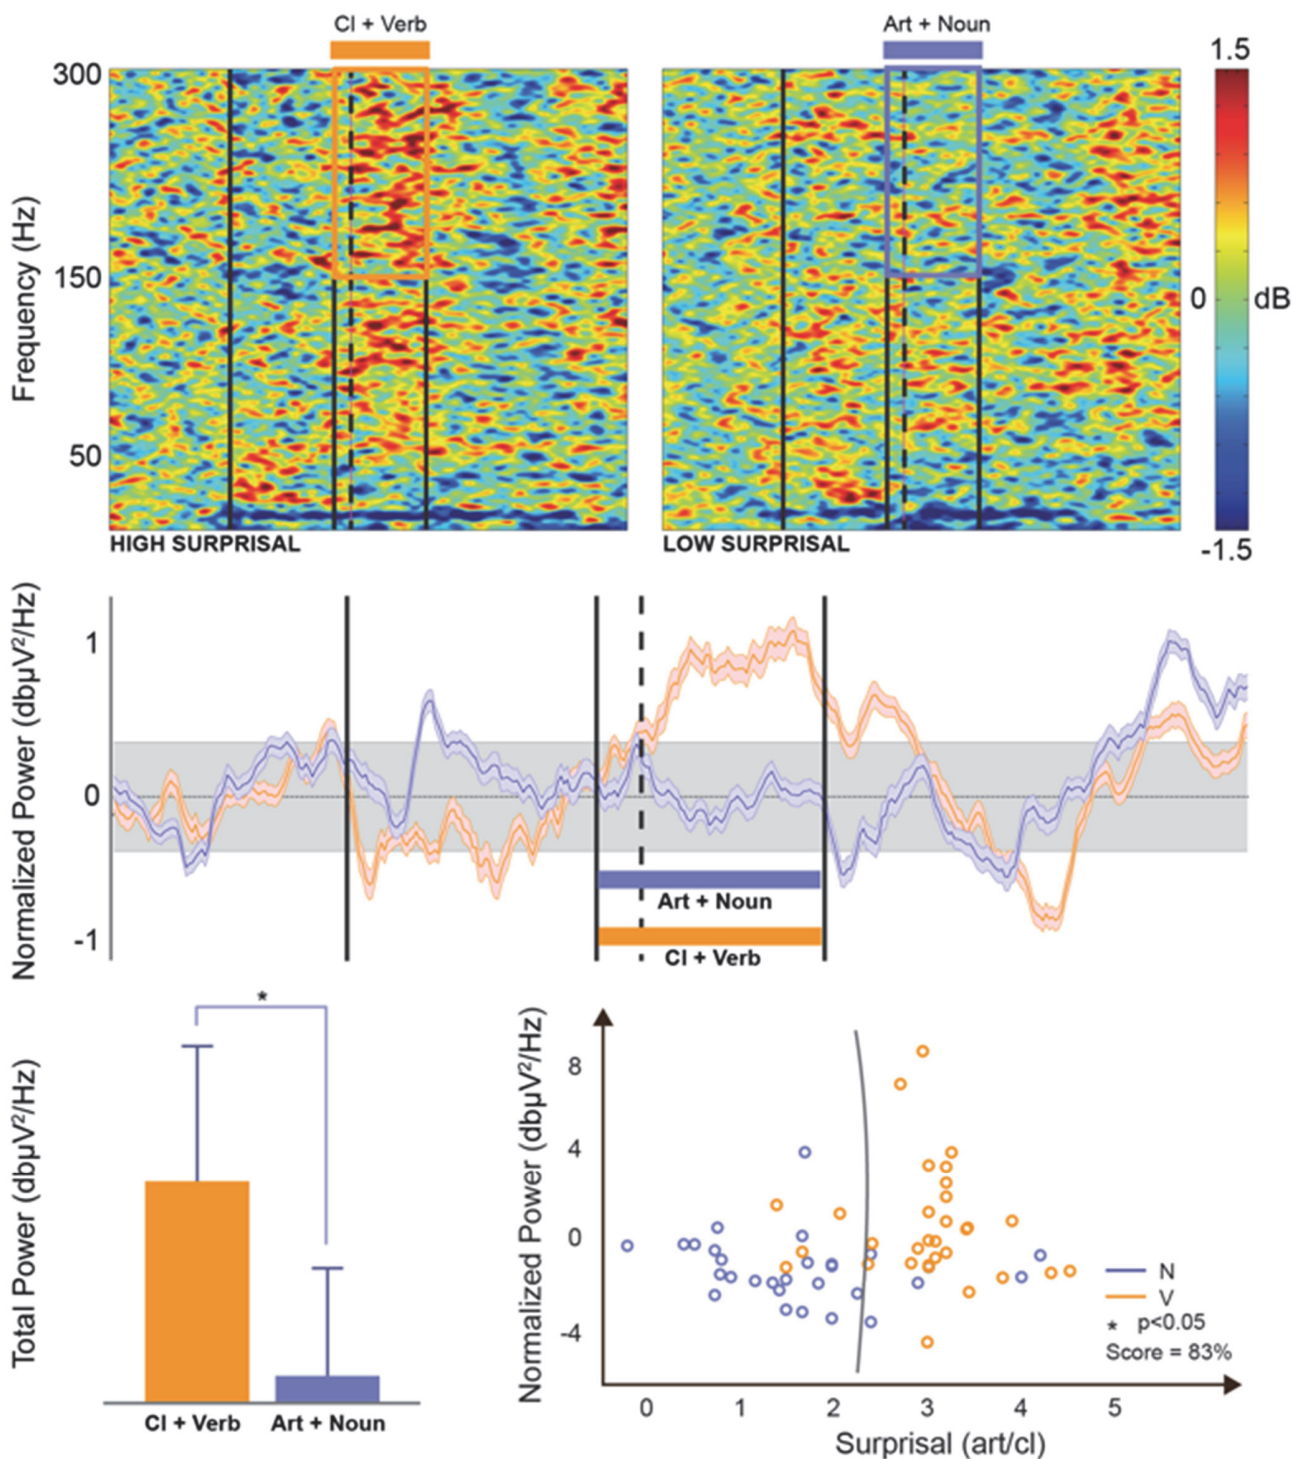

**Figure 3: Example of event-related spectral perturbation and decoding for a responsive contact (channel).** The first row represents the Event-Related Spectral Perturbation (ERSP) for VPs (left) and NPs (right) respectively. The four vertical lines respectively represent the beginning of the phrase, the beginning of the Art/CI (homophonous phrase), the beginning of the first word after Art/CI (i.e., Verb/Noun), the beginning of the word after that. The high gamma time Region of Interest (tROI) is highlighted by a superimposed square over the ERSP plots. The second row shows the baseline-normalized power

in the [150 - 300] Hz spectrum interval. The four vertical bars have the same meaning as in the ERSP plots. The third row shows on the left a comparison between the VP tROI (orange) and NP tROI (blue) high gamma power. Similarly, the scatter plot on the right represents the tROI normalized power (y axis) and surprisal (x axis). The gray line optimally separates (Support Vector Machine analysis) the Verb and Noun classes in the surprisal/power feature space with a Score of 83%.



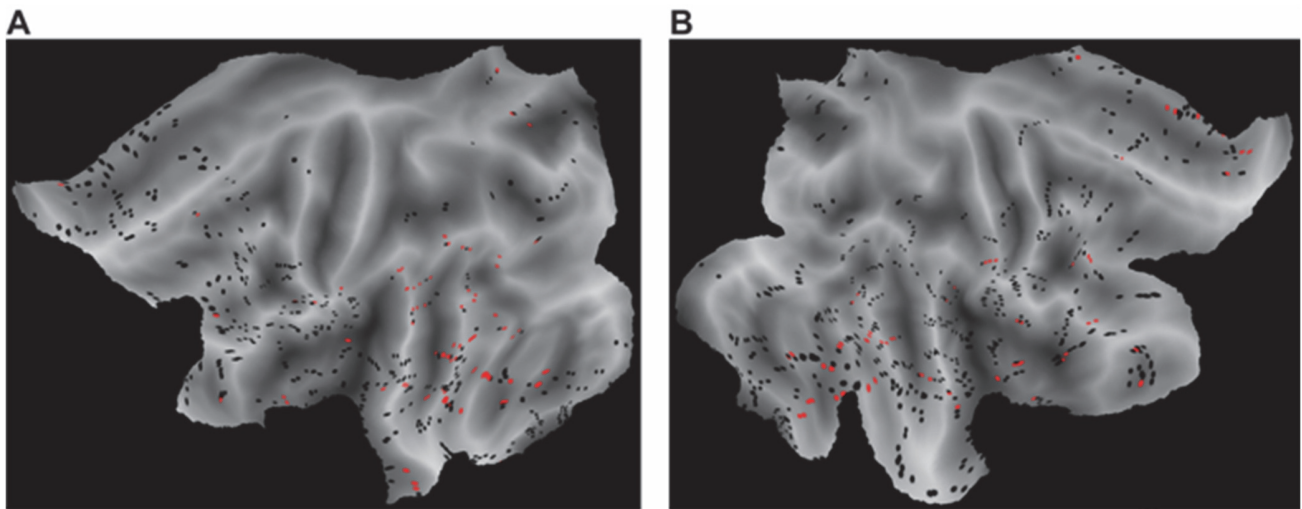

**Figure 4: Main Responsive Contacts.** Responsive contacts in the dominant (left panel) and non-dominant (right panel) hemispheres, merged across subjects over an average MRI template, group level.

## References

- 1 Akmajian, A., Demers, R. A., Farmer, A. K. & Harnish, R. M. An Introduction to Language and Communication.
- 2 Kandel, E. R. *et al. Principles of neural science*. Vol. 4 (McGraw-hill New York, 2000).
- 3 Friederici, A. D., Chomsky, N., Berwick, R. C., Moro, A. & Bolhuis, J. J. Language, mind and brain. *Nature Human Behaviour* **1**, 713 (2017).
- 4 Ding, N., Melloni, L., Zhang, H., Tian, X. & Poeppel, D. Cortical tracking of hierarchical linguistic structures in connected speech. *Nature neuroscience* **19**, 158 (2016).
- 5 Kayne, R. S. What is Suppletive Allomorphy? On went and on\* goed in English. *lingbuzz/003241* (2016).
- 6 Magrassi, L., Aromataris, G., Cabrini, A., Annovazzi-Lodi, V. & Moro, A. Sound representation in higher language areas during language generation. *Proceedings of the National Academy of Sciences* **112**, 1868-1873 (2015).
- 7 Vigliocco, G., Vinson, D. P., Druks, J., Barber, H. & Cappa, S. F. Nouns and verbs in the brain: a review of behavioural, electrophysiological, neuropsychological and imaging studies. *Neuroscience & Biobehavioral Reviews* **35**, 407-426 (2011).
- 8 Lenneberg, E. H. The biological foundations of language. *Hospital Practice* **2**, 59-67 (1967).
- 9 Musso, M. *et al.* Broca's area and the language instinct. *Nature neuroscience* **6**, 774 (2003).
- 10 Rizzi, L. The discovery of language invariance and variation, and its relevance for the cognitive sciences. *Behavioral and Brain Sciences* **32**, 467-468 (2009).
- 11 Nelson, M. J. *et al.* Neurophysiological dynamics of phrase-structure building during sentence processing. *Proceedings of the National Academy of Sciences* **114**, E3669-E3678 (2017).
- 12 Moro, A. & Chomsky, N. *The boundaries of Babel: The brain and the enigma of impossible languages*. (MIT press, 2015).
- 13 Hale, J. in *Proceedings of the second meeting of the North American Chapter of the Association for Computational Linguistics on Language technologies*. 1-8 (Association for Computational Linguistics).
- 14 Cossu, M. *et al.* Stereoelectroencephalography-guided radiofrequency thermocoagulation in the epileptogenic zone: a retrospective study on 89 cases. *Journal of neurosurgery* **123**, 1358-1367 (2015).
- 15 Avanzini, P. *et al.* Four-dimensional maps of the human somatosensory system. *Proceedings of the National Academy of Sciences*, 201601889 (2016).
- 16 Buzsáki, G. & Schomburg, E. W. What does gamma coherence tell us about inter-regional neural communication? *Nature neuroscience* **18**, 484 (2015).
- 17 Ray, S., Hsiao, S. S., Crone, N. E., Franaszczuk, P. J. & Niebur, E. Effect of stimulus intensity on the spike-local field potential relationship in the secondary somatosensory cortex. *Journal of Neuroscience* **28**, 7334-7343 (2008).
- 18 Gaona, C. M. *et al.* Nonuniform high-gamma (60–500 Hz) power changes dissociate cognitive task and anatomy in human cortex. *Journal of Neuroscience* **31**, 2091-2100 (2011).
- 19 Kucewicz, M. T. *et al.* High frequency oscillations are associated with cognitive processing in human recognition memory. *Brain* **137**, 2231-2244 (2014).
- 20 Flinker, A., Piai, V., Knight, R. T., Rueschemeyer, S. & Gaskell, G. Intracranial electrophysiology in language research. *Rueschemeyer, S.; Gaskell, G.(ed.), The Oxford handbook of psycholinguistics (2nd ed.)*, chapter-43 (2018).

- 21 Arya, R., Horn, P. S. & Crone, N. E. ECoG high-gamma modulation versus electrical stimulation for presurgical language mapping. *Epilepsy & Behavior* **79**, 26-33 (2018).
- 22 Makeig, S., Debener, S., Onton, J. & Delorme, A. Mining event-related brain dynamics. *Trends in cognitive sciences* **8**, 204-210 (2004).
- 23 Cappa, S. F. in *Perspectives on agrammatism* 63-73 (Psychology Press, 2012).
- 24 Roark, B., Bachrach, A., Cardenas, C. & Pallier, C. in *Proceedings of the 2009 Conference on Empirical Methods in Natural Language Processing: Volume 1-Volume 1*. 324-333 (Association for Computational Linguistics).
- 25 Henderson, J. M., Choi, W., Lowder, M. W. & Ferreira, F. Language structure in the brain: A fixation-related fMRI study of syntactic surprisal in reading. *Neuroimage* **132**, 293-300 (2016).
- 26 Anumanchipalli, G. K., Chartier, J. & Chang, E. F. Speech synthesis from neural decoding of spoken sentences. *Nature* **568**, 493 (2019).
- 27 Armeni, K., Willems, R. M. & Frank, S. L. Probabilistic language models in cognitive neuroscience: Promises and pitfalls. *Neuroscience & Biobehavioral Reviews* **83**, 579-588 (2017).
- 28 Roark, B. Probabilistic top-down parsing and language modeling. *Computational Linguistics* **27**, 249-276, doi:10.1162/089120101750300526 (2001).
- 29 Baroni, M. & Kilgarriff, A. in *EACL 2006 - 11th Conference of the European Chapter of the Association for Computational Linguistics, Proceedings of the Conference*. 87-90.
- 30 Munari, C. *et al.* Stereo - electroencephalography methodology: advantages and limits. *Acta Neurologica Scandinavica* **89**, 56-67 (1994).
- 31 Cossu, M. *et al.* Stereoelectroencephalography in the presurgical evaluation of focal epilepsy: a retrospective analysis of 215 procedures. *Neurosurgery* **57**, 706-718; discussion 706-718, doi:10.1093/neurosurgery/57.4.706 (2005).
- 32 Cardinale, F., Casaceli, G., Raneri, F., Miller, J. & Russo, G. L. Implantation of stereoelectroencephalography electrodes: a systematic review. *Journal of Clinical Neurophysiology* **33**, 490-502 (2016).
- 33 Fedorov, A. *et al.* 3D Slicer as an image computing platform for the Quantitative Imaging Network. *Magnetic Resonance Imaging* **30**, 1323-1341, doi:10.1016/j.mri.2012.05.001 (2012).
- 34 Delorme, A. & Makeig, S. EEGLAB: an open source toolbox for analysis of single-trial EEG dynamics including independent component analysis. *J Neurosci Methods* **134**, 9-21, doi:10.1016/j.jneumeth.2003.10.009 (2004).
- 35 Makeig, S. & Onton, J. ERP features and EEG dynamics: an ICA perspective. *Oxford Handbook of Event-Related Potential Components*. New York, NY: Oxford (2009).

## Supplemental Data Items

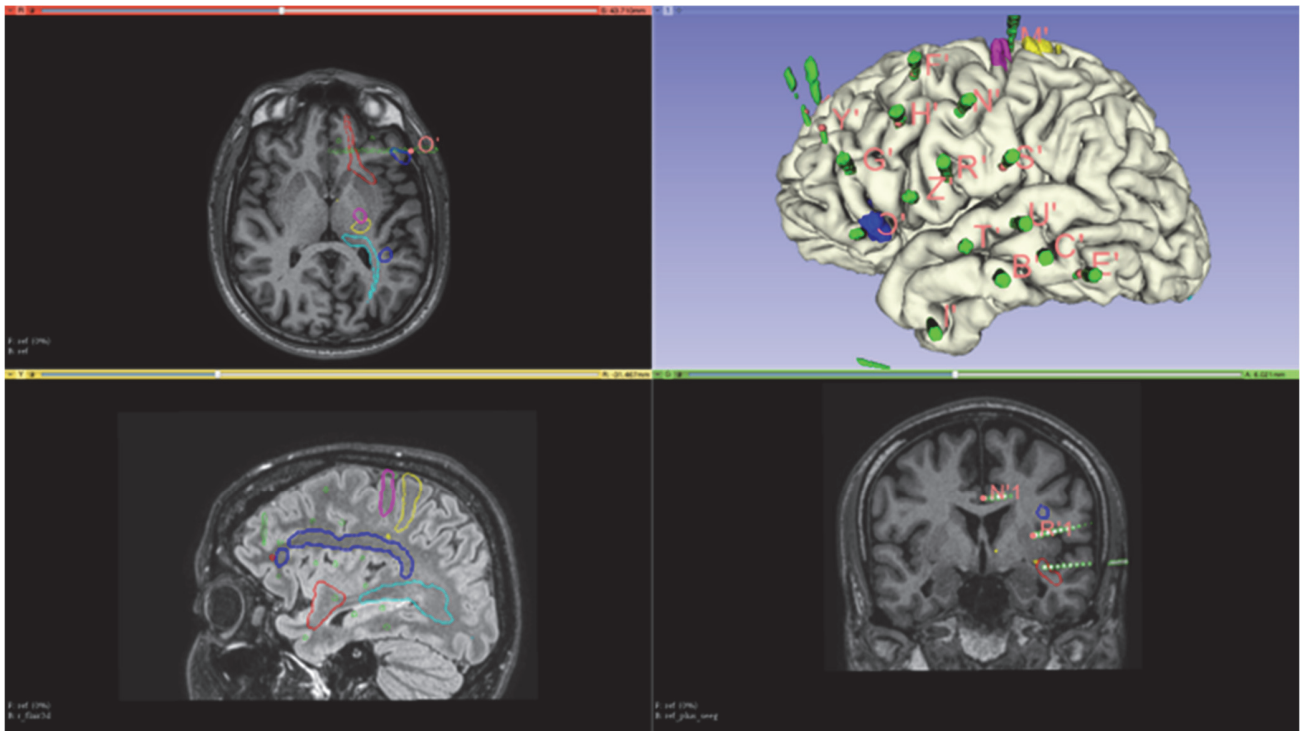

**Figure S1:** Example of Multimodal and interactive scene assembled with 3D Slicer software of patient s11.

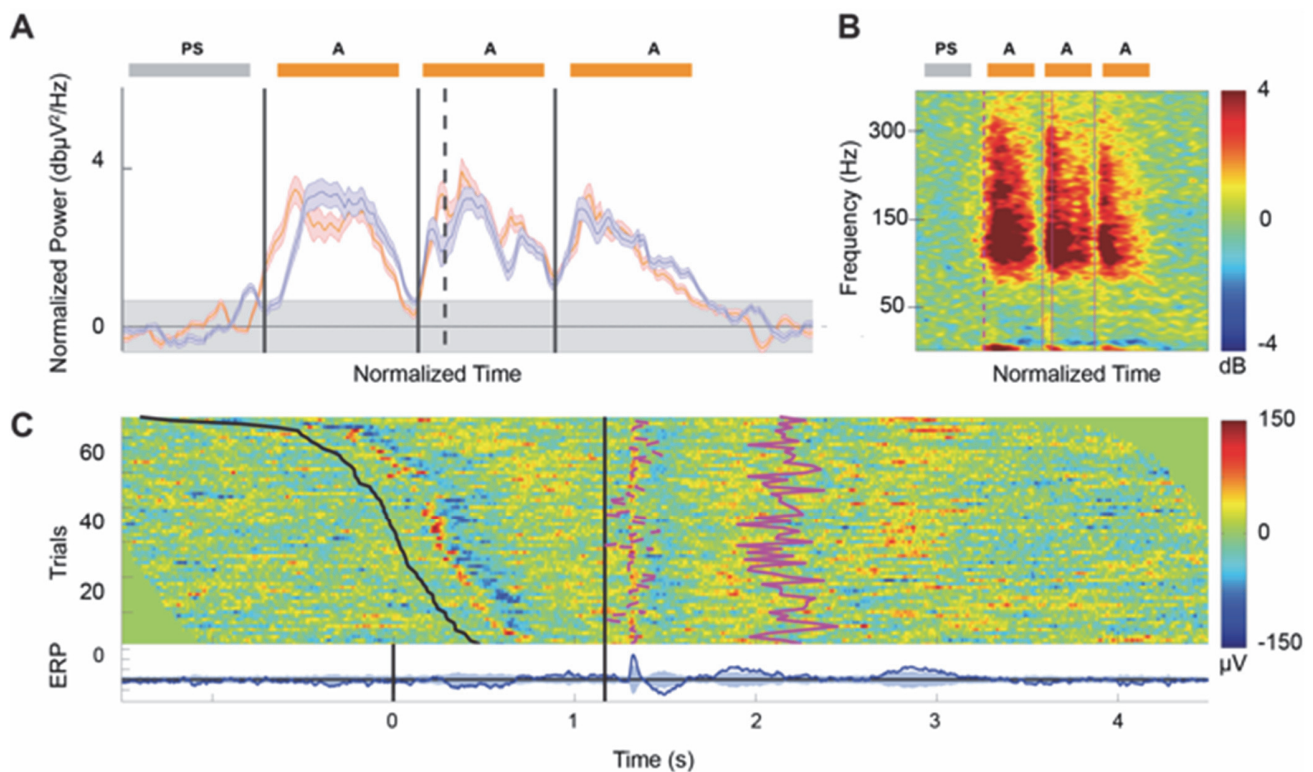

**Figure S2:** Heschl ERPIImage and Time Frequency. A) Band-specific (150 -300 Hz) ERSP (bERSP) for VPs (red) and NPs (blue) respectively for a Heschl contact. The four vertical bars separate the auditory stimuli (A) from the prestimulus interval (PS) and respectively indicate the beginning of the phrase, the beginning of the Art/CI, the beginning of the word immediately following Art/CI (Verb/Noun), the beginning of the word after. B) Time-warped Event-Related Spectral Perturbation (ERSP) of verb and noun phrases pooled together. The four vertical bars have the same meaning as in the baseline-normalized power plots (panel A). C) Event-related single-trial potential image (ERPImage) time-locked to the stimulus presentation. Trials are aligned to the beginning of Art/CI (continuous black vertical line). The first black line indicates the beginning of the phrase for each trial. The following two pink lines respectively indicate the beginning of the word immediately following Art/CI (Verb/Noun) and the beginning of the word after, for each trial.





|                        | <b>Noun-phrase</b> |               |             |                | <b>Verb-phrase</b> |               |             |                |
|------------------------|--------------------|---------------|-------------|----------------|--------------------|---------------|-------------|----------------|
|                        | Article            |               |             |                | Pronoun            |               |             |                |
|                        | <i>valid</i>       | <i>miss %</i> | <i>mean</i> | <i>std</i>     | <i>valid</i>       | <i>miss %</i> | <i>mean</i> | <i>std</i>     |
| freq. Repubblica form  | 30                 | 3.23          | 1.45        | 0.50           | 21                 | 32.26         | 2.95        | 0.52           |
| freq. ITWAC form       | 31                 | 0             | 1.46        | 0.48           | 22                 | 29.03         | 2.84        | 0.64           |
| freq. Repubblica lemma | 30                 | 3.23          | 1.14        | 0.86           | 31                 | 0             | 2.23        | 0.66           |
| freq ITWAC lemma       | 31                 | 0             | 1.39        | 0.68           | 31                 | 0             | 2.39        | 0.63           |
|                        | Noun               |               |             |                | Verb               |               |             |                |
|                        | <i>valid</i>       | <i>miss %</i> | <i>mean</i> | <i>st.dev.</i> | <i>valid</i>       | <i>Miss %</i> | <i>mean</i> | <i>st.dev.</i> |
| freq. Repubblica form  | 31                 | 0             | 3.90        | 0.76           | 18                 | 41.94         | 3.73        | 0.9            |
| freq. ITWAC form       | 31                 | 0             | 3.78        | 0.57           | 23                 | 25.81         | 4.07        | 1.16           |
| freq. Repubblica lemma | 31                 | 0             | 3.67        | 1.09           | 31                 | 0             | 3.80        | 0.71           |
| freq. ITWAC lemma      | 31                 | 0             | 3.90        | 0.72           | 31                 | 0             | 3.72        | 0.71           |

**Table S1:** Surprisal values analyses. Number of valid cases, percentage of missing, mean and the standard deviation relative to the surprisal value, separately for the two experimental conditions (Noun-phrase, Verb-phrase).

|             | Low<br>Surprisal | High<br>Surprisal | tot<br>(n) |
|-------------|------------------|-------------------|------------|
| noun-phrase | 26               | 5                 | 31         |
| verb-phrase | 5                | 26                | 31         |
| tot (n)     | 31               | 31                |            |

**Table S2:** distribution of the surprisal values of articles and clitics on the basis of the median ( $M = 1.9097$ ) obtained from the occurrence of the lemma in the ITWAC database.



|                                        |                            |
|----------------------------------------|----------------------------|
| <b>Number of patients</b>              | <b>10</b>                  |
| <b>Gender</b>                          | <b>5 male and 5 female</b> |
| <b>Median age at SEEG</b>              | <b>32 (range 17-44)</b>    |
| <b>Median years of scholarization</b>  | <b>13 (range 0-17)</b>     |
| <b>Median age of onset of epilepsy</b> | <b>16 (range 2-30)</b>     |
| <b>Median duration of epilepsy</b>     | <b>15 (range 3-30)</b>     |

**Table S3: Demographic data.** Summary of demographic data of patients that successfully completed the study. SEEG: Stereo-Electro-Encephalography.

| ID  | Tot implanted contacts (tot implanted electrodes) |          | RC num | SITE OF SC lead number (electrodes num) |     |                                    |     |              |     |                      |     |                                      |      |                                   |     |                           |     |                |     |               |     |                         |       |                       |      |                         |     |                      |     |                                    |     |                          |     |
|-----|---------------------------------------------------|----------|--------|-----------------------------------------|-----|------------------------------------|-----|--------------|-----|----------------------|-----|--------------------------------------|------|-----------------------------------|-----|---------------------------|-----|----------------|-----|---------------|-----|-------------------------|-------|-----------------------|------|-------------------------|-----|----------------------|-----|------------------------------------|-----|--------------------------|-----|
|     |                                                   |          |        | Orbital cortex                          |     | Superior frontal gyrus (areas 8-9) |     | SMA (area 6) |     | Middle frontal gyrus |     | Inferior frontal gyrus (areas 44-45) |      | Frontal cingulate gyrus (area 24) |     | Fronto-parietal operculum |     | Insular cortex |     | Temporal pole |     | Superior temporal gyrus |       | Middle temporal gyrus |      | Inferior temporal gyrus |     | Temporo-basal cortex |     | Temporo-Occipital cortex (area 19) |     | Inferior parietal lobule |     |
|     |                                                   |          |        | DH                                      | NDH | DH                                 | NDH | DH           | NDH | DH                   | NDH | DH                                   | NDH  | DH                                | NDH | DH                        | NDH | DH             | NDH | DH            | NDH | DH                      | NDH   | DH                    | NDH  | DH                      | NDH | DH                   | NDH | DH                                 | NDH | DH                       | NDH |
| s03 | 0                                                 | 264 (19) | 59     |                                         |     | 1                                  |     | 1            | 5   | 13(3)                | 2   | 3                                    | 8(3) | 2                                 |     |                           |     |                |     |               |     |                         | 11(3) | 6(2)                  | 9(2) |                         |     |                      |     |                                    |     |                          |     |
| s06 | 168(13)                                           | 0        | 18     | 1                                       |     |                                    |     | 1            | 1   | 4(2)                 | 2   | 1                                    | 1    |                                   |     |                           |     |                |     |               |     | 8(2)                    | 2     | 2                     | 2    |                         |     |                      |     |                                    |     |                          |     |
| s09 | 0                                                 | 272 (19) | 11     | 1                                       |     |                                    |     |              |     |                      |     |                                      |      |                                   |     |                           |     |                |     |               |     |                         |       |                       |      |                         |     |                      |     |                                    |     |                          |     |
| s10 | 225 (6)                                           | 0        | 71     |                                         |     |                                    |     | 1            |     |                      |     |                                      |      |                                   |     |                           |     |                |     |               |     | 13(3)                   | 10(2) | 5                     | 2    | 12(3)                   |     |                      |     |                                    |     |                          |     |
| s11 | 219 (17)                                          | 0        | 18     |                                         |     |                                    |     |              |     |                      |     |                                      |      |                                   |     |                           |     |                |     |               |     | 8(2)                    | 2     | 2                     |      |                         |     |                      |     |                                    |     |                          |     |
| s12 | 0                                                 | 210(15)  | 2      |                                         |     |                                    |     |              |     | 1                    |     |                                      |      |                                   |     |                           |     |                |     |               |     |                         |       |                       |      |                         |     |                      |     |                                    |     |                          |     |
| s13 | 210 (8)                                           | 0        | 6      |                                         |     |                                    |     |              |     |                      |     |                                      |      |                                   |     |                           |     |                |     |               |     |                         |       |                       |      |                         |     |                      |     |                                    |     |                          |     |
| s17 | 0                                                 | 206(15)  | 5      |                                         |     |                                    |     |              |     |                      |     |                                      |      |                                   |     |                           |     |                |     |               |     |                         |       |                       |      |                         |     |                      |     |                                    |     |                          |     |
| s21 | 0                                                 | 205 (15) | 43     |                                         |     |                                    |     |              |     |                      |     |                                      |      |                                   |     |                           |     |                |     |               |     |                         |       |                       |      |                         |     |                      |     |                                    |     |                          |     |
| s23 | 25 (3)                                            | 200 (14) | 9      |                                         |     |                                    |     |              |     |                      |     |                                      |      |                                   |     |                           |     |                |     |               |     |                         |       |                       |      |                         |     |                      |     |                                    |     |                          |     |

**Table S4: Responsive contacts.** Highlights of responsive contacts in the whole population of patients that completed the study. RC: Responsive Contacts; SMA: Supplementary Motor Area; DH: Dominant Hemisphere; NDH: Non-Dominant Hemisphere. 6 leads (3 electrodes) in patient s10 showed an auditory response into the mesial cortex of occipital lobe.
